# Supplementary material for: Auditory Cortex Asymmetry Associations with Individual Differences in Language and Cognition
Source: MDPI journal article supplement (doi:10.3390/brainsci14010014), 2023-12-23
Supplement: s1 [file s1]

# Auditory Cortex Asymmetry Associations with Individual Differences in Language and Cognition

Mark A. Eckert <sup>1,\*</sup>, Kenneth I. Vaden, Jr. <sup>1</sup> and Silvia Paracchini <sup>2</sup>

<sup>1</sup> Department of Otolaryngology—Head and Neck Surgery, Medical University of South Carolina, Charleston, SC 29425, USA; vaden@musc.edu

<sup>2</sup> School of Medicine, University of St. Andrews, North Haugh, St. Andrews KY16 9TF, UK; sp58@st-andrews.ac.uk

\* Correspondence: eckert@musc.edu

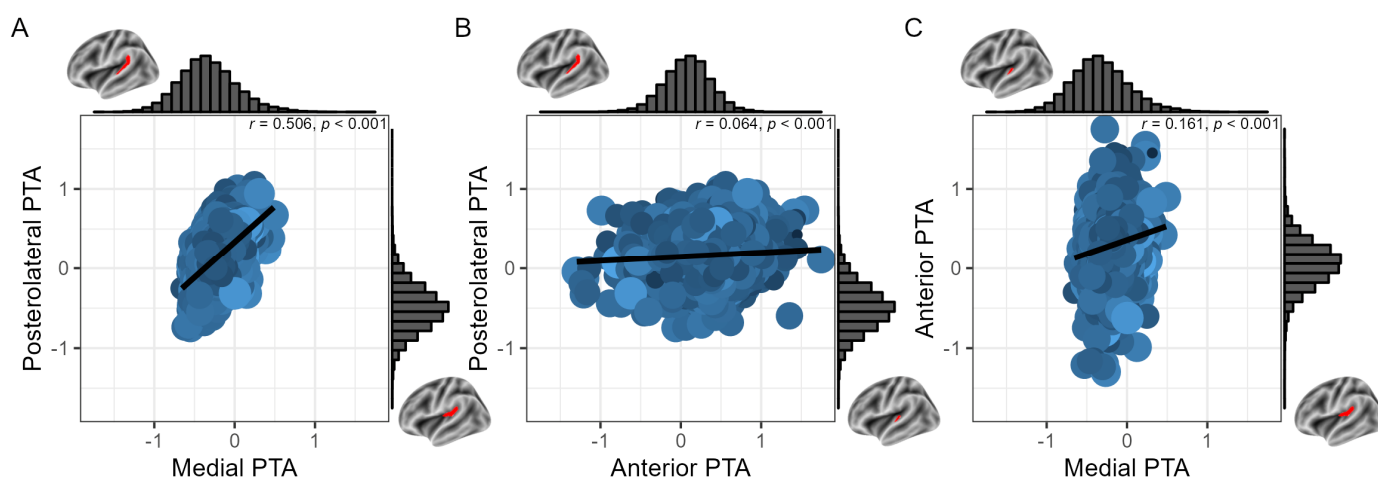

**Figure S1.** Planum temporale regions of interest, their surface area asymmetry distributions, and inter-relationships. A) The medial PTA and posterolateral PTA variables were more strongly associated than B,C) the anterior (Heschl's sulcus) PTA with the medial and posterolateral PTA. The scale of each axis denotes asymmetries that are defined as  $(\text{left} - \text{right}) / ((\text{left} + \text{right})/2)$ , where positive values indicate leftward asymmetries. Lighter color shading and larger symbol size reflects a larger total cortical surface area.

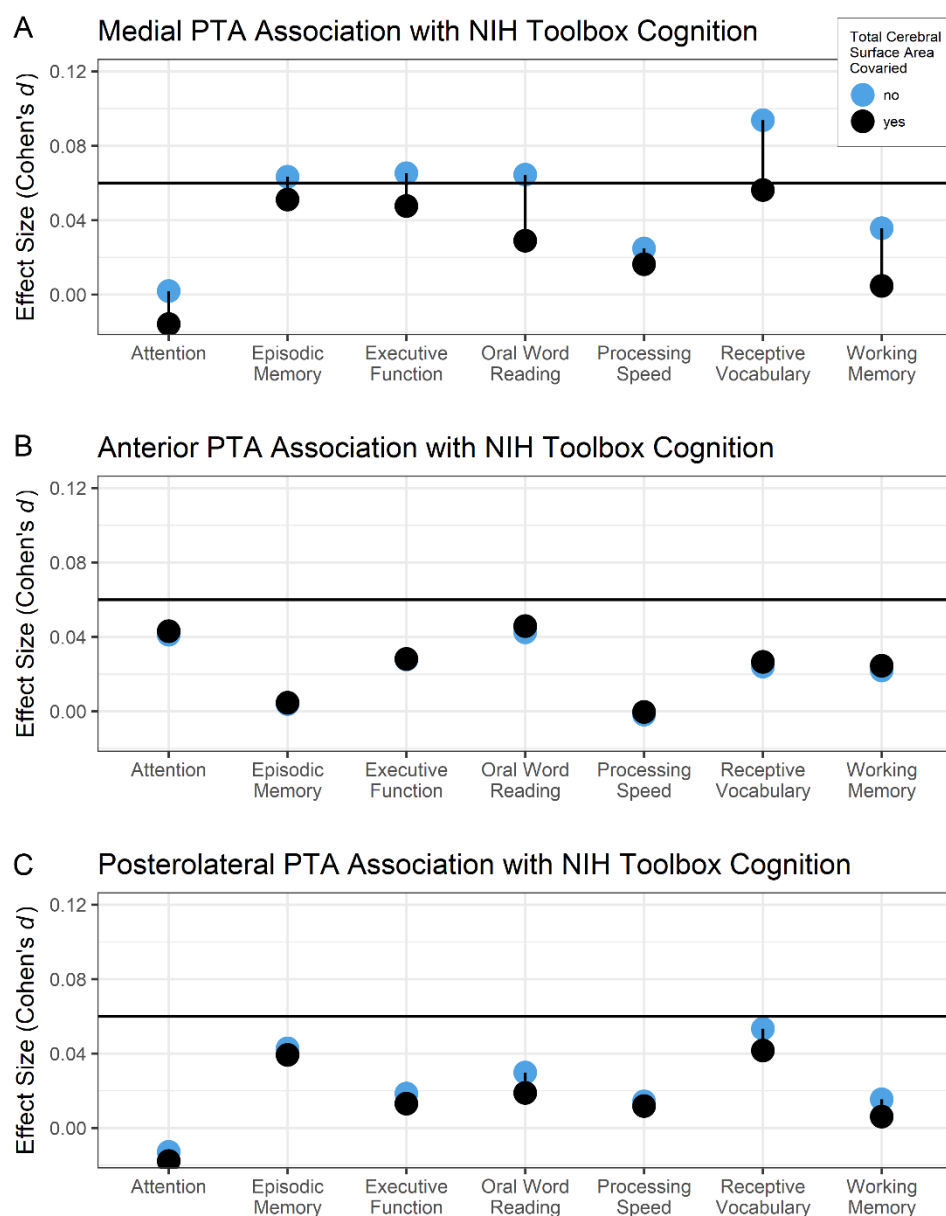

**Figure S2.** Effect sizes for the relationship between baseline PTA and NIH Toolbox Cognition measures is shown before (blue) and after (black) controlling for total cortical surface area for the medial PTA (**A**), anterior PTA (**B**), and posterolateral PTA (**C**). Both sets of analyses included statistical controls for sex, age, parental education, research site, and Freesurfer topological defects. The horizontal line is the small effect Cohen's *d* score corresponding to a  $p < 0.05$  effect after Bonferroni correction for 21 comparisons given the large ABCD sample size.

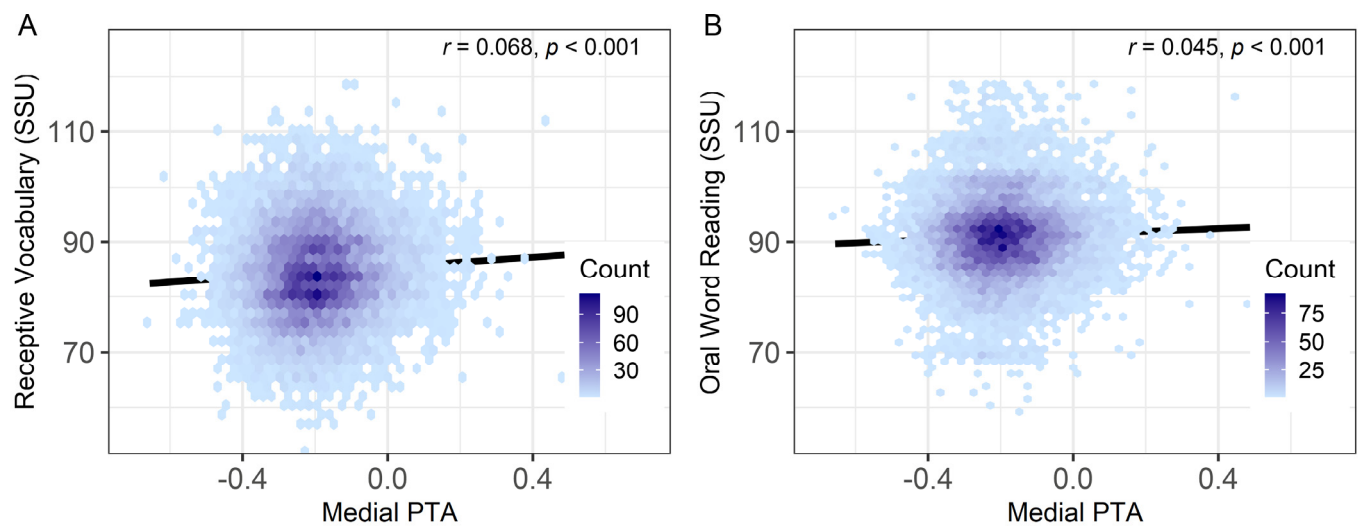

**Figure S3.** –More leftward medial PTA occurred with (A) better receptive vocabulary and (B) better oral word reading. Positive values indicate more leftward asymmetry. SSU: standardized scores uncorrected for age. Bivariate correlations coefficients and regression results are presented in Section 3.1.

**Table S1.** Pearson correlations between demographic, receptive vocabulary and oral word reading, and brain structure measures.

| Variable                                   | 1                         | 2                      | 3                      | 4                      | 5                      | 6                      | 7                      | 8                      | 9                      |
|--------------------------------------------|---------------------------|------------------------|------------------------|------------------------|------------------------|------------------------|------------------------|------------------------|------------------------|
| 1. Sex<br>(Boys:1; Girls:2)                |                           |                        |                        |                        |                        |                        |                        |                        |                        |
| 2. Age                                     | −0.02*<br>[−0.04, −0.00]  |                        |                        |                        |                        |                        |                        |                        |                        |
| 3. Parental Education                      | −0.01<br>[−0.02, 0.01]    | 0.02*<br>[0.00, 0.04]  |                        |                        |                        |                        |                        |                        |                        |
| 4. Handedness<br>(Non-Right:0;<br>Right:1) | −0.02*<br>[−0.04, −0.00]  | −0.01<br>[−0.03, 0.01] | .01<br>[−0.01, 0.03]   |                        |                        |                        |                        |                        |                        |
| 5. Receptive Vocabulary                    | −0.03**<br>[−0.05, −0.01] | 0.23**<br>[0.22, 0.25] | 0.41**<br>[0.39, 0.42] | 0.00<br>[−0.02, 0.02]  |                        |                        |                        |                        |                        |
| 6. Oral Word Reading                       | −0.00<br>[−0.02, 0.02]    | 0.22**<br>[0.20, 0.23] | 0.33**<br>[0.32, 0.35] | −0.02<br>[−0.04, 0.00] | 0.53**<br>[0.52, 0.55] |                        |                        |                        |                        |
| 7. Medial PTA                              | −0.14**<br>[−0.16, −0.12] | −0.00<br>[−0.02, 0.02] | 0.06**<br>[0.04, 0.07] | −0.01<br>[−0.02, 0.01] | 0.07**<br>[0.05, 0.09] | 0.04**<br>[0.03, 0.06] |                        |                        |                        |
| 8. Anterior PTA                            | 0.02<br>[−0.00, 0.03]     | 0.01<br>[−0.01, 0.03]  | 0.00<br>[−0.02, 0.02]  | −0.01<br>[−0.03, 0.01] | 0.02*<br>[0.00, 0.04]  | 0.02**<br>[0.01, 0.04] | 0.16**<br>[0.14, 0.18] |                        |                        |
| 9. Posterolateral PTA                      | −0.09**<br>[−0.11, −0.07] | 0.01<br>[−0.01, 0.03]  | 0.03**<br>[0.01, 0.05] | −0.01<br>[−0.03, 0.01] | 0.04**<br>[0.02, 0.06] | 0.02*<br>[0.00, 0.04]  | 0.51**<br>[0.49, 0.52] | 0.06**<br>[0.05, 0.08] |                        |
| 10. Total Surface Area                     | −0.46**<br>[−0.47, −0.44] | −0.01<br>[−0.03, 0.01] | 0.19**<br>[0.17, 0.20] | 0.00<br>[−0.01, 0.02]  | 0.23**<br>[0.21, 0.24] | 0.19**<br>[0.17, 0.21] | 0.16**<br>[0.14, 0.18] | −0.01<br>[−0.03, 0.01] | 0.07**<br>[0.05, 0.09] |

Posterolateral PTA did not exhibit a significant association with receptive vocabulary after controlling for medial PTA ( $t = 0.404$ ,  $p = 0.686$ ).

**Table S2.** Effect sizes for the association between each Destrieux region surface area asymmetry and the NIH Toolbox language-related measures.

| Destrieux (label) Asymmetry Region of Interest<br>(ordered by descending Cohen's <i>d</i> for Receptive Vocabulary Knowledge) | Cohen's <i>d</i>  |                                |
|-------------------------------------------------------------------------------------------------------------------------------|-------------------|--------------------------------|
|                                                                                                                               | Oral Word Reading | Receptive Vocabulary Knowledge |
| posterior ramus of the lateral sulcus (medial PTA)                                                                            | 0.089             | 0.118                          |
| anterior segment of the circular sulcus of the insula                                                                         | 0.023             | 0.081                          |
| subcallosal gyrus                                                                                                             | 0.069             | 0.080                          |
| pericallosal sulcus                                                                                                           | 0.057             | 0.072                          |
| planum temporale (posterolateral PTA)                                                                                         | 0.046             | 0.068                          |
| opercular part of the inferior frontal gyrus                                                                                  | 0.046             | 0.061                          |
| planum polare of the superior temporal gyrus                                                                                  | 0.031             | 0.060                          |
| paracentral lobule and sulcus                                                                                                 | 0.030             | 0.056                          |
| long insular gyrus and central sulcus of the insula                                                                           | 0.032             | 0.051                          |
| anterior transverse collateral sulcus                                                                                         | 0.047             | 0.049                          |
| lateral orbital sulcus                                                                                                        | 0.060             | 0.047                          |
| supramarginal gyrus                                                                                                           | 0.035             | 0.045                          |
| superior segment of the circular sulcus of the insula                                                                         | 0.006             | 0.039                          |
| triangular part of the inferior frontal gyrus                                                                                 | 0.018             | 0.039                          |
| posterior-dorsal part of the cingulate gyrus                                                                                  | 0.004             | 0.037                          |
| lateral aspect of the superior temporal gyrus                                                                                 | 0.042             | 0.037                          |
| middle-anterior part of the cingulate gyrus and sulcus                                                                        | −0.004            | 0.035                          |
| inferior frontal sulcus                                                                                                       | 0.019             | 0.035                          |
| anterior part of the cingulate gyrus and sulcus                                                                               | 0.037             | 0.032                          |
| inferior part of the precentral sulcus                                                                                        | 0.055             | 0.029                          |
| lateral occipito-temporal gyrus                                                                                               | −0.011            | 0.028                          |
| transverse temporal sulcus (anterior PTA)                                                                                     | 0.045             | 0.027                          |
| subcentral gyrus and sulci                                                                                                    | −0.001            | 0.026                          |
| orbital gyri                                                                                                                  | 0.011             | 0.024                          |
| temporal pole                                                                                                                 | 0.020             | 0.022                          |
| central sulcus                                                                                                                | 0.028             | 0.018                          |
| middle frontal gyrus                                                                                                          | 0.050             | 0.018                          |
| superior occipital sulcus and transverse occipital sulcus                                                                     | 0.060             | 0.018                          |
| transverse frontopolar gyri and sulci                                                                                         | −0.001            | 0.012                          |
| superior frontal sulcus                                                                                                       | 0.006             | 0.012                          |
| superior occipital gyrus                                                                                                      | −0.008            | 0.009                          |
| postcentral gyrus                                                                                                             | 0.027             | 0.008                          |
| lateral occipito-temporal sulcus                                                                                              | 0.002             | 0.008                          |
| cuneus                                                                                                                        | −0.006            | 0.008                          |
| anterior transverse temporal gyrus                                                                                            | 0.003             | 0.006                          |
| gyrus rectus                                                                                                                  | 0.034             | 0.004                          |
| horizontal ramus of the anterior segment of the lateral sulcus                                                                | −0.001            | 0.003                          |
| middle-posterior part of the cingulate gyrus and sulcus                                                                       | −0.049            | 0.002                          |
| orbital part of the inferior frontal gyrus                                                                                    | −0.003            | 0.002                          |
| precentral gyrus                                                                                                              | 0.004             | −0.001                         |
| marginal branch of the cingulate sulcus                                                                                       | 0.017             | −0.001                         |
| parahippocampal gyrus                                                                                                         | 0.032             | −0.001                         |
| inferior temporal gyrus                                                                                                       | 0.019             | −0.003                         |
| fronto-marginal gyrus and sulcus                                                                                              | −0.007            | −0.003                         |
| subparietal sulcus                                                                                                            | −0.016            | −0.004                         |
| vertical ramus of the anterior segment of the lateral sulcus                                                                  | 0.019             | −0.004                         |
| medial occipito-temporal sulcus and lingual sulcus                                                                            | −0.011            | −0.006                         |
| posterior transverse collateral sulcus                                                                                        | −0.007            | −0.007                         |
| middle frontal sulcus                                                                                                         | −0.027            | −0.008                         |
| superior part of the precentral sulcus                                                                                        | −0.042            | −0.009                         |
| anterior occipital sulcus and preoccipital notch                                                                              | −0.030            | −0.013                         |
| calcarine sulcus                                                                                                              | −0.015            | −0.015                         |
| inferior segment of the circular sulcus of the insula                                                                         | 0.015             | −0.016                         |
| posterior-ventral part of the cingulate gyrus                                                                                 | −0.014            | −0.017                         |

---

|                                                    |        |        |
|----------------------------------------------------|--------|--------|
| lingual gyrus                                      | −0.003 | −0.018 |
| intraparietal sulcus and transverse parietal sulci | −0.025 | −0.018 |
| postcentral sulcus                                 | −0.009 | −0.020 |
| sulcus intermedius primus                          | −0.048 | −0.021 |
| middle temporal gyrus                              | −0.024 | −0.026 |
| superior parietal lobule                           | −0.012 | −0.028 |
| occipital pole                                     | −0.019 | −0.030 |
| inferior occipital gyrus and sulcus                | −0.065 | −0.031 |
| short insular gyri                                 | −0.031 | −0.031 |
| middle occipital gyrus                             | −0.008 | −0.032 |
| suborbital sulcus                                  | −0.050 | −0.033 |
| superior temporal sulcus                           | −0.033 | −0.043 |
| medial orbital sulcus                              | −0.039 | −0.044 |
| angular gyrus                                      | −0.018 | −0.045 |
| middle occipital sulcus and lunatus sulcus         | −0.019 | −0.047 |
| inferior temporal sulcus                           | −0.008 | −0.047 |
| superior frontal gyrus                             | −0.037 | −0.048 |
| orbital sulci                                      | −0.042 | −0.063 |
| parieto-occipital sulcus                           | −0.061 | −0.070 |
| precuneus                                          | −0.024 | −0.075 |

---

Negative effect sizes indicated a negative association between the asymmetry and behavioral measure. Blue font is used to highlight the PTA regions of interest.
